# Population Pharmacokinetics of Alfentanil: The Average Dose-Plasma Concentration Relationship and Interindividual Variability in Patients

Pierre O. Maitre, M.D.,\* Samuel Vozeh, M.D.,† Jos Heykants, Ph.D.,‡  
Dick A. Thomson, M.D. Ph.D.,§ Donald R. Stanski, M.D.¶

The population pharmacokinetic parameters describing the plasma concentration versus time profile of alfentanil in patients undergoing general anesthesia were determined from 614 plasma concentration measurements collected in four previously reported studies with a total of 45 patients. A nonlinear regression analysis evaluating the effect of six concomitant variables revealed a significant influence of body weight on the volume of the central compartment ( $V_c$ ), and a decrease with age of total body clearance (CL) and of redistribution rate from the deep compartment ( $k_{11}$ ). A small but significant effect of sex on the  $V_c$  was also observed. The duration of anesthesia and the concomitant administration of inhalational anesthetics had no effect on alfentanil pharmacokinetic parameters. The mean CL and  $V_c$  for alfentanil in a 70-kg male, aged less than 40 yr, were estimated as 0.356 l/min and 7.77 l, respectively. After correction for age, body weight, and sex, the remaining interindividual variability of alfentanil kinetics (expressed as coefficient of variation) was 48% for CL and 33% for  $V_c$ . These population pharmacokinetic parameter estimates should increase the accuracy of predicting concentration-time profiles for intravenous alfentanil infusions. A computer program is presented that allows prediction of the alfentanil plasma concentration and the 68% interval limits of the prediction from the study data analysis. (Key words: Anal-

gesics: alfentanil. Anesthetics, intravenous: alfentanil. Pharmacokinetics: population.)

ALFENTANIL IS A NEW opiate with a unique pharmacokinetic and pharmacodynamic profile. Compared with fentanyl, it has a short terminal elimination half-life because of the relatively small steady-state distribution volume.<sup>1</sup> Its short blood:brain equilibration time results in

This article is accompanied by an editorial. Please see: Grevel J, Whiting B: The relevance of pharmacokinetics to optimal intravenous anesthesia. ANESTHESIOLOGY 66:1-2, 1987.

\* Staff Anesthesiologist, Department of Anesthesiology, University of Basel.

† Associate Professor of Medicine (Clinical Pharmacology), University of Basel.

‡ Director, Department of Drug Metabolism and Pharmacokinetics, Janssen Pharmaceutica.

§ Professor and Chairman, Department of Anesthesiology, University of Basel.

¶ Associate Professor of Anesthesia and Medicine (Clinical Pharmacology), Stanford University School of Medicine.

Received from the Departments of Anesthesiology and Medicine, Division of Clinical Pharmacology, University of Basel/Kantonsspital, CH-4031 Basel, Switzerland; Department of Drug Metabolism and Pharmacokinetics, Janssen Pharmaceutics, B-2340 Beerse, Belgium; and the Department of Anesthesia and Medicine (Clinical Pharmacology), Stanford University School of Medicine, Stanford, California. Accepted for publication June 19, 1986. Supported, in part, by Janssen Pharmaceutica, B-2340 Beerse, Belgium; the Anesthesiology/Pharmacology Research Foundation; NIA R01-AGO3104; the Veterans Administration Merit Review; and the Professor Max Cloëtta Foundation.

Address reprint requests to Dr. Stanski: Anesthesiology Service (112A), Veterans Administration Medical Center, 3801 Miranda Avenue, Palo Alto, California 94304.

## ABBREVIATIONS<sup>§1</sup>

$A_1, A_2, A_3$  = hybrid rate constants characterizing a triexponential decay function ( $\text{min}^{-1}$ )

BW = body weight (kg)

CL = total body clearance (l/min)

$CL_j$  = true unknown clearance of patient j

$\hat{CL}_j$  = estimated clearance of patient j

$\overline{CL}_y$  = mean value of clearance in patients  $\leq 40$  yr (l/min)

$C_p$  = concentration at any time t ( $\mu\text{g/l}$ )

$C_{p50}$  = concentration producing a clinically measurable effect in 50% of patients

$k_{10}$  = elimination rate constant from compartment 1 ( $\text{min}^{-1}$ )

$k_{12}$  = rate constant for drug transfer from compartment 1 to compartment 2 ( $\text{min}^{-1}$ )

$k_{13}$  = rate constant for drug transfer from compartment 1 to compartment 3 ( $\text{min}^{-1}$ )

$k_{21}$  = rate constant for drug transfer from compartment 2 to compartment 1 ( $\text{min}^{-1}$ )

$k_{31}$  = rate constant for drug transfer from compartment 3 to compartment 1 ( $\text{min}^{-1}$ )

$\hat{k}_{31j}$  = estimated  $k_{31}$  of patient j

$\bar{k}_{31}$  = mean value of  $k_{31}$  in patients  $\leq 40$  yr ( $\text{min}^{-1}$ )

LLD = log likelihood difference (difference in the value of twice the log likelihood function, i.e., twice the log of the likelihood ratio)

t = any specified time following start of the infusion or iv administration (min)

$V_c$  = volume of central compartment (l)

$\overline{V}_c$  = population mean value of the volume of the central compartment (l)

$\hat{V}_{c_j}$  = estimated volume of the central compartment of patient j

$\overline{V}_{cw}$  = population mean value of the weight-normalized volume of the central compartment (l/kg)

$\omega_{CL}^2$  = interindividual variance of CL

$\omega_{V_c}^2$  = interindividual variance of  $V_c$

$\sigma^2$  = residual intraindividual variance

TABLE 1. Characteristics of the Five Study Groups from which the Data Were Taken

| Group No. | Investigator            | Patient and Type of Surgery                     | Induction of Anesthesia | Concomitant Administration of Inhalational Anesthetics | Body Weight (kg) Mean (range) | No. of Patients | Age (yr) Mean (range) | Assay |
|-----------|-------------------------|-------------------------------------------------|-------------------------|--------------------------------------------------------|-------------------------------|-----------------|-----------------------|-------|
| 1         | Bovill <sup>12</sup>    | Middle-aged adults: various surgical procedures | Thiopental              | Yes                                                    | 71.1 (52-79)                  | 11              | 44.2 (19-63)          | RIA   |
| 2         | Camu <sup>13</sup>      | Middle-aged women: general surgery              | Etomidate               | Yes                                                    | 57.3 (46-72)                  | 5               | 43.0 (33-55)          | GLC   |
| 3         | Helmers <sup>14</sup>   | Middle-aged adults: abdominal surgery           | Etomidate               | Yes                                                    | 69.6 (54-102)                 | 9               | 35.9 (27-44)          | RIA   |
| 4         | Helmers <sup>14</sup>   | Elderly patients: abdominal surgery             | Etomidate               | Yes                                                    | 66.3 (46-81)                  | 15              | 76.3 (68-91)          | RIA   |
| 5         | Schüttler <sup>15</sup> | Middle-aged women: short gynecologic surgery    | Thiopental              | No                                                     | 61.3 (51-70)                  | 5               | 37.0 (24-44)          | RIA   |

RIA = radioimmunoassay; GLC = gas liquid chromatography.

a rapid onset of narcotic effect (peak effect occurs in 1-2 min).<sup>2</sup> Because of this short blood:brain equilibration, redistribution of the drug from the brain to other tissues is an important factor in the dissipation of alfentanil's narcotic effect after bolus intravenous administration. A continuous infusion of alfentanil is necessary to maintain adequate plasma concentrations and narcotic effect for longer surgical procedures (*i.e.*, greater than 30 min).<sup>3</sup> Recently, the therapeutic plasma concentrations of alfentanil have been defined for perioperative events.<sup>4,5</sup> Different surgical/anesthesia stimuli require different alfentanil plasma concentrations to provide adequate clinical anesthesia. To ablate the hemodynamic responses to upper abdominal surgery, an average alfentanil plasma concentration of 412 ng/ml was needed, while adequate postoperative spontaneous respiration required an average alfentanil plasma concentration below 223 ng/ml.<sup>5</sup> Aulsems and Hug<sup>4</sup> have shown that a variable-rate alfentanil infusion can be used effectively to change the alfentanil plasma concentrations required for changing surgical stimuli.

Given that the therapeutic plasma concentrations of alfentanil are known, it is possible to use pharmacokinetic concepts<sup>6,7</sup> (the mathematical relationship between dose and plasma concentration) to design drug-administration schemes for the infusion of alfentanil. A two- or three-infusion rate scheme has been proposed and evaluated in achieving steady-state alfentanil plasma concentrations.<sup>8</sup> Recently, a computer-driven infusion pump that uses a pharmacokinetic model of alfentanil disposition has been used to rapidly achieve and maintain the desired alfentanil plasma concentrations during a surgical procedure.<sup>9,10</sup> All of these dosing concepts require the appropriate alfentanil pharmacokinetic data. In any population of patients, pharmacokinetic parameters that describe the average patient can be derived.<sup>11</sup> It is obvious that identical infusion rates in different patients will result in different

alfentanil plasma concentrations. The variability that occurs between patients (interindividual) and within a patient (intraindividual) causes the average pharmacokinetic data to achieve different plasma concentrations in each patient. A major goal of pharmacokinetic research is to identify those factors that may significantly alter a drug's pharmacokinetics (*i.e.*, age, weight, disease states, other drugs) and to adjust appropriately the dosing scheme. A second goal is to quantitate the degree of interindividual and intraindividual pharmacokinetic variability in the population. With this information, one can predict the average concentration and the confidence bounds for a given drug administration scheme.

The goal of this study was to determine the alfentanil population (average) pharmacokinetic parameters and the interindividual and intraindividual variability of the population pharmacokinetics. For this purpose, published alfentanil plasma concentration data obtained by four different investigators<sup>12-15</sup> from patients receiving general anesthesia were analyzed. The effect of six selected variables (age, weight, sex, induction agent, use of an inhalational anesthetic, and duration of anesthesia) on alfentanil pharmacokinetics was also evaluated.

## Methods

### PATIENTS

Data from four previously published studies<sup>12-15</sup> were pooled. They consist of five study groups (table 1) with a total of 45 patients and 614 alfentanil plasma concentrations. In all patients, alfentanil was administered at the beginning of anesthesia, either as an intravenous bolus or as a short infusion over 10-30 s. The doses ranged between 50 and 120  $\mu\text{g}/\text{kg}$ . The plasma concentration profile was followed during 4-12 hr after administration. In addition to the time of sampling and the plasma concen-

tration value, the data collected in each individual included the following six variables: age, body weight, sex, duration of anesthesia, concomitant administration of etomidate and/or inhalational anesthetics. Table 1 summarizes the distribution of these characteristics in the five different study groups. Figure 1 shows the plot of the 45 dose-normalized plasma concentration profiles. The details of the intraoperative patient management are indicated in the original publications.

#### ASSAY

Plasma alfentanil concentrations were measured using a radioimmunoassay<sup>16</sup> (RIA) method for Groups 1, 3, 4, and 5 and a gas liquid chromatography<sup>17</sup> (GLC) method for Group 2. The RIA was performed according to the classical procedure, *i.e.*, the antiserum was added last to the mixture of unknown sample and <sup>3</sup>H-alfentanil.<sup>18</sup> A comparison of the RIA and GLC methods revealed a close agreement without any systematic differences (Woestenborghs and Heykants, unpublished results).

#### DATA ANALYSIS

The NONMEM program, developed for population pharmacokinetic analysis by Beal and Sheiner,\*\* was used to analyze the plasma concentration data. The method has been described previously in detail.<sup>19</sup> It implements a multiple nonlinear regression procedure to derive the population average of the pharmacokinetic parameters and to identify the factors that may influence them. One of the most important features of NONMEM as compared with standard nonlinear regression programs applied to pharmacokinetics, *e.g.*, NONLIN,<sup>20</sup> is its ability to pool simultaneously data from different patients. This has several advantages: 1) the number of samples per individual can be kept relatively small; 2) the influence of concomitant variables on the pharmacokinetic parameters can be directly investigated; and 3) the residual interindividual variability of the pharmacokinetic parameters can be estimated in addition to their mean values. In this way, it is possible to describe the average pharmacokinetic profile of a drug in a patient population and also to estimate the magnitude of the differences in the plasma concentration expected under a given dosage in different patients.

#### PHARMACOKINETIC MODEL

A three-compartment open body model with elimination from the central compartment was assumed (fig. 2). The pharmacokinetic model assumed that alfentanil

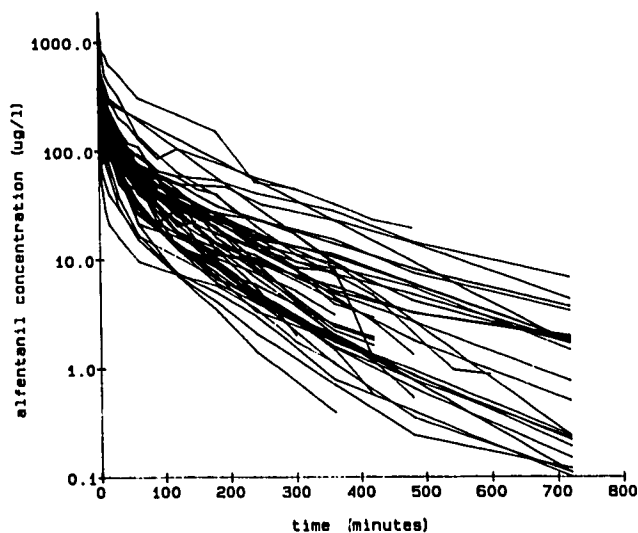

FIG. 1. Plot of the 45 alfentanil plasma concentration profiles. (Each concentration has been normalized for an iv bolus of 50 µg/kg for this figure only.)

pharmacokinetics are first order and concentration independent. Preliminary analysis comparing three- and two-compartment models unequivocally favored the former (see "Results"). Because one of the major goals of this study was to determine the effect of different patient characteristics and interventions on the basic model parameters, in particular on the total body clearance and the volume of distribution of the central compartment, the following parameterization was chosen: volume of distribution of the central compartment ( $V_c$ ), total body clearance (CL), and the microconstants ( $k_{12}$ ,  $k_{21}$ ,  $k_{13}$ ,  $k_{31}$ ). The closed-form solution for the plasma concentration at time "t" can be written as a sum of three exponentials<sup>21</sup>:

$$C_p(t) = A_1 e^{-\lambda_1 t} + A_2 e^{-\lambda_2 t} + A_3 e^{-\lambda_3 t} \quad (1)$$

where  $A_1$ ,  $A_2$ ,  $A_3$ ,  $\lambda_1$ ,  $\lambda_2$ , and  $\lambda_3$  are hybrid functions of the six parameters just mentioned. The values of CL,  $V_c$ ,  $k_{12}$ ,  $k_{21}$ ,  $k_{13}$ , and  $k_{31}$  are estimated by the nonlinear

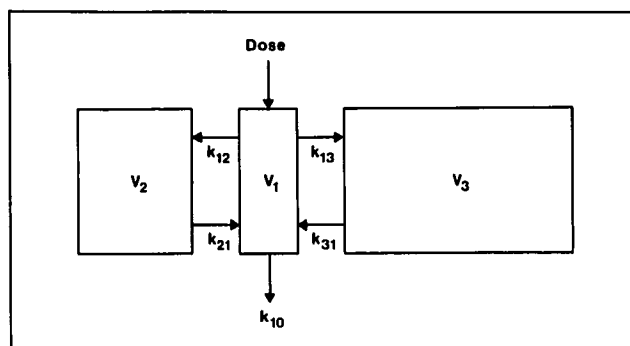

FIG. 2. A three-compartment model.

\*\* Beal SL, Sheiner LB: NONMEM Users Guide. San Francisco, University of California, 1979.

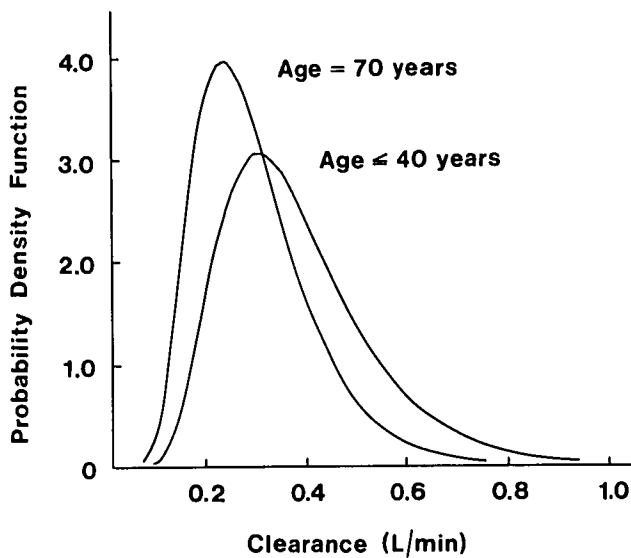

FIG. 3. Estimated probability density function (PDF) for the total body clearance of alfentanil in the patient populations aged 40 or less and 70 yr, respectively. Log-normal distribution is assumed. (PDF of a random variable, *i.e.*, clearance in this example, defines the probability that the random variable will assume a value within a given interval. The PDF of a log-normal distribution is characterized by the mean and the standard deviation, which are estimated by NONMEM.)

regression program. The calculation of  $\lambda_1$ ,  $\lambda_2$ ,  $\lambda_3$  and  $A_1$ ,  $A_2$ ,  $A_3$  from these six parameters and the partial derivatives of the plasma concentration with respect to each parameter, required by NONMEM, were performed by a subroutine written in FORTRAN.

In order to investigate the influence of age, weight, sex, duration of anesthesia, and etomidate and inhalational anesthetics on the pharmacokinetics of alfentanil, additional regression parameters (termed influencing parameters) were included in the model quantifying the relationship between these factors and the pharmacokinetic parameters. For example, the effect of age on CL for patients more than 40 yr old was found to be best described by the following relationship:

$$\hat{CL}_j = \overline{CL}_y - F_{age} \cdot (Age_j - 40) \quad (2)$$

where  $\overline{CL}_y$  is the estimate of the mean population value for patients less than 40 years old;  $\hat{CL}_j$  is the estimate of the clearance value of patient  $j$  corrected for his or her age; and  $F_{age}$  is an influencing parameter, the value of which is estimated by NONMEM during the regression.

#### INTERINDIVIDUAL VARIABILITY

Although a part of the interindividual variability of alfentanil pharmacokinetics can be explained by the factors mentioned earlier, there will always remain some dif-

ference in the plasma-concentration profile among patients. To both describe this unexplained interindividual variability and estimate its magnitude, random effects are included in the regression model that allow some parameters to vary (randomly) among patients. A log normal distribution was assumed to describe the interindividual variability of the pharmacokinetic parameters. This choice was based on our own previous experience and other published reports, which showed that in most cases, a log-normal (skewed) distribution, rather than a normal distribution, better approximates the frequency distribution of the pharmacokinetic parameters in a patient population.<sup>22-25</sup> An example of a log-normal distribution, derived in this study, of the CL of alfentanil is shown in figure 3. To express this in the regression model, log-additive random interindividual error is assumed. Thus, for CL we can write:

$$\ln CL_j = \ln \hat{CL}_j + \eta_j^{CL} \quad (3)$$

or

$$CL_j = \hat{CL}_j \cdot e^{\eta_j^{CL}} \quad (4)$$

where  $\eta_j^{CL}$  is a random variable with mean value zero and variance  $\omega_{CL}^2$ . Note that  $\omega_{CL}^2$  is also the interindividual variance of CL after correcting for age. Similarly for  $V_c$ :

$$\ln V_{c_j} = \ln \hat{V}_{c_j} + \eta_j^{V_c} \quad (5)$$

where  $\eta_j^{V_c}$  is a random variable with mean zero and variance  $\omega_{V_c}^2$ .

A log-additive model was also assumed for the remaining unexplained *intraindividual* variability, which is due to assay errors, time recording inaccuracy, model misspecification, or changes in the patient's physiologic state during the sampling period:

$$\ln Cp_{ij} = \ln \hat{Cp}_{ij} + \epsilon_{ij} \quad (6)$$

where  $Cp_{ij}$  is the " $i$ "th measured plasma concentration in the " $j$ "th individual,  $\hat{Cp}_{ij}$  is the corresponding predicted concentration (Equation 1), and  $\epsilon_{ij}$  is a random variable with mean zero and variance  $\sigma^2$ . By using a log-additive model for the residual error, one states that the error between the observed and the predicted concentrations increases approximately in proportion to the predicted concentration, a phenomenon frequently observed with pharmacokinetic data. In addition, the model assumes that the variances of  $\eta$  and  $\epsilon$  are the same in the different study groups.

#### REGRESSION PROCEDURE AND GOODNESS OF FIT TEST

A modified stepwise procedure, analogous to multiple stepwise linear regression analysis,<sup>26</sup> was used to deter-

TABLE 2. Regression Analysis: Two- versus Three-compartment Model

| Model                   | CL<br>(l/min) | $\bar{V}_c$<br>(l) | $k_{12}$<br>(min <sup>-1</sup> ) | $k_{21}$<br>(min <sup>-1</sup> ) | $k_{13}$<br>(min <sup>-1</sup> ) | $k_{31}$<br>(min <sup>-1</sup> ) | LLD  |
|-------------------------|---------------|--------------------|----------------------------------|----------------------------------|----------------------------------|----------------------------------|------|
| Two-compartment model   | 0.276         | 10.1               | 0.0609                           | 0.0224                           | —                                | —                                | —    |
| Three-compartment model | 0.278         | 7.85               | 0.117                            | 0.0775                           | 0.0221                           | 0.00997                          | 142* |

\*P < 0.0005.

mine which influencing parameters should be included in the final model describing the population pharmacokinetics of alfentanil. At each step the results of two computer runs were compared. In one, the parameter in question is free to be estimated; in the second, it is constrained to a hypothesized value, which corresponds to the null hypothesis (*i.e.*, no effect of the influencing parameter). The following decision criteria were considered when choosing between the two models: the difference in  $-2 \log$  likelihood (LLD), which is supplied by NONMEM (asymptotically  $\chi^2$  distributed, analogous to F-value in linear regression), the standard errors and correlation matrix of the parameter estimates, the residual plots, and the change in the remaining random interindividual variability. Because of the asymptotic nature of the  $\chi^2$  test, a conservative value of 7.8 for the LLD (corresponding to  $P < 0.005$  for 1 degree of freedom) was chosen as the minimum value at which a parameter could be included in the final regression model.

The nonlinear regression analysis was divided into six parts:

1. The original data file, containing 614 plasma concentration measurements, was randomly divided into two subsets containing all individuals but only one-half of the plasma concentration measurements. Only the first subset, comprising 307 data points, was then used for the subsequent regression analysis (parts 2–5).

2. The fixed effects (the pharmacokinetic parameters and their influencing factors) were evaluated using a modified forward stepwise procedure as described earlier.

3. For each parameter that remained in the model at the end of part 2, its contribution was reevaluated when

all other parameters were included in the regression model.

4. The random effects (the variance components) were evaluated with the best model found for the fixed effects in parts 2 and 3.

5. The fixed effects were again reevaluated, as in part 3, with the final model for random effects.

6. Finally, the goodness of fit was tested with the second half of the data not used in parts 2–5. This data subset was fitted to the final regression model with all parameters constrained to their estimated values, and the variance of the residual (intraindividual error ( $\sigma^2$ )) was determined. A good fit should result in similar estimates of  $\sigma^2$  with both data subsets.

### Results

The results at different steps of the regression analysis that yielded significant differences between the two models are described in tables 2–7.

#### NUMBER OF COMPARTMENTS

The comparison of two- and three-compartment models is shown in table 2. It can be seen that the data could be better described by the three-compartment model ( $P < 0.0005$ ).

#### AGE

Retaining the three-compartment model, the effect of age on alfentanil pharmacokinetics was then studied. Out

TABLE 3. Regression Analysis: Effect of Age on CL and  $k_{31}$

| Model                      | CL <sub>y</sub><br>(l/min) | $\bar{V}_c$<br>(l) | $k_{12}$<br>(min <sup>-1</sup> ) | $k_{21}$<br>(min <sup>-1</sup> ) | $k_{13}$<br>(min <sup>-1</sup> ) | $k_{31}$<br>(min <sup>-1</sup> ) | F <sub>CL</sub> ‡ | F <sub>k<sub>31</sub></sub> ‡ | LLD |
|----------------------------|----------------------------|--------------------|----------------------------------|----------------------------------|----------------------------------|----------------------------------|-------------------|-------------------------------|-----|
| No influence of age        | 0.278                      | 7.85               | 0.117                            | 0.0775                           | 0.0221                           | 0.00997                          | —                 | —                             | —   |
| CL corrected for age       | 0.333                      | 8.10               | 0.105                            | 0.0536                           | 0.00956                          | 0.00728                          | 0.00258           | —                             | 34* |
| $k_{31}$ corrected for age | 0.282                      | 7.93               | 0.100                            | 0.0658                           | 0.0195                           | 0.0115                           | —                 | $6.39 \cdot 10^{-5}$          | 10† |

\* P < 0.0005.

† P < 0.005.

‡ F<sub>CL</sub> and F<sub>k<sub>31</sub></sub> = 0 for age ≤ 40 yr.

TABLE 4. Regression Analysis: Effect of Body Weight on  $V_c$ 

| Parameter Model          | $\overline{CL}$<br>(l/min) | $\overline{V_c}$ (l)/<br>$\overline{V_{cw}}$ (l/kg) | $\overline{k_{12}}$<br>(min <sup>-1</sup> ) | $\overline{k_{21}}$<br>(min <sup>-1</sup> ) | $\overline{k_{13}}$<br>(min <sup>-1</sup> ) | $\overline{k_{31}}$<br>(min <sup>-1</sup> ) | $F_{CL}\dagger$ | $F_{k_{31}}\dagger$   | LLD |
|--------------------------|----------------------------|-----------------------------------------------------|---------------------------------------------|---------------------------------------------|---------------------------------------------|---------------------------------------------|-----------------|-----------------------|-----|
| $V_c$ independent of BW  | 0.333                      | 8.01 (l)                                            | 0.110                                       | 0.0554                                      | 0.00965                                     | 0.00762                                     | 0.00264         | $0.857 \cdot 10^{-5}$ | —   |
| $V_c$ expressed per kgBW | 0.371                      | 0.127 (l/kg)                                        | 0.108                                       | 0.0707                                      | 0.0182                                      | 0.0131                                      | 0.00245         | 0.000114              | 24* |

\*  $P < 0.0005$ .†  $F_{CL}$  and  $F_{k_{31}} = 0$  for Age  $\leq 40$  yr.TABLE 5. Regression Analysis: Effect of Sex on  $V_c$ 

| Parameter Model         | $\overline{CL}$<br>(l/min) | $\overline{V_c}$<br>(l/kg) | $\overline{k_{12}}$<br>(min <sup>-1</sup> ) | $\overline{k_{21}}$<br>(min <sup>-1</sup> ) | $\overline{k_{13}}$<br>(min <sup>-1</sup> ) | $\overline{k_{31}}$<br>(min <sup>-1</sup> ) | $F_{CL}\dagger$ | $F_{k_{31}}\dagger$ | $F_{sex}$            | LLD |
|-------------------------|----------------------------|----------------------------|---------------------------------------------|---------------------------------------------|---------------------------------------------|---------------------------------------------|-----------------|---------------------|----------------------|-----|
| No influence of sex     | 0.371                      | 0.127                      | 0.108                                       | 0.0707                                      | 0.0182                                      | 0.0131                                      | 0.00245         | 0.000114            | —                    | —   |
| $V_c$ corrected for sex | 0.356                      | 0.111                      | 0.102                                       | 0.0673                                      | 0.0170                                      | 0.0126                                      | 0.00267         | 0.000097            | 1.15 (M)<br>1.00 (F) | 14* |

\*  $P < 0.0005$ .†  $F_{CL}$  and  $F_{k_{31}} = 0$  for Age  $\leq 40$  yr.

of the six pharmacokinetic parameters, a significant association with age was found for CL and  $k_{31}$  (table 3). The influence of age could be best described by the following relationship:

- 1) No influence of age for patients 40 yr and younger;
- 2) A linearly decreasing function of age for patients more than 40 yr old:

$$\widehat{CL}_j = \overline{CL}_y - F_{CL} \cdot (\text{Age}_j - 40) \quad (7)$$

TABLE 6. Estimates of Fixed Effects

| Parameter                                   | NONMEM Estimates ( $\pm$ SE)                  |
|---------------------------------------------|-----------------------------------------------|
| CL (l/min) Age $\leq 40$                    | 0.356 ( $\pm 0.031$ )                         |
| CL (l/min) Age $> 40$                       | $0.356 - [0.00269 \cdot (\text{Age} - 40)]$   |
| $k_{12}$ (min <sup>-1</sup> )               | 0.104 ( $\pm 0.014$ )                         |
| $k_{21}$ (min <sup>-1</sup> )               | 0.0673 ( $\pm 0.0165$ )                       |
| $k_{13}$ (min <sup>-1</sup> )               | 0.0170 ( $\pm 0.0111$ )                       |
| $k_{31}$ (min <sup>-1</sup> ) Age $\leq 40$ | 0.0126 ( $\pm 0.00398$ )                      |
| $k_{31}$ (min <sup>-1</sup> ) Age $> 40$    | $0.0126 - [0.000113 \cdot (\text{Age} - 40)]$ |
| $V_c$ (l/kg) Male                           | 0.111 ( $\pm 0.00895$ )                       |
| $V_c$ (l/kg) Female                         | 0.111 · 1.15                                  |

TABLE 7. Estimates of Random Effects

| Parameter                                   | NONMEM Estimates*<br>( $\pm$ SE) |
|---------------------------------------------|----------------------------------|
| Interindividual variability of $CL\dagger$  | 48% ( $\pm 9$ )                  |
| Interindividual variability of $V_c\dagger$ | 33% ( $\pm 6$ )                  |
| Residual intraindividual variability        | 25% ( $\pm 2$ )                  |

\* Expressed as coefficient of variation.

† A positive correlation between CL and  $V_c$  was found ( $r = 0.46$ ).

and

$$\widehat{k}_{31j} = \overline{k}_{31y} - F_{k_{31}} \cdot (\text{Age}_j - 40) \quad (8)$$

where  $\widehat{CL}_j$  and  $\widehat{k}_{31j}$  are corrected estimates for patient  $j$  aged  $\text{Age}_j$ ;  $\overline{CL}_y$  and  $\overline{k}_{31y}$  are mean population values for young patients ( $\leq 40$  yr); and  $F_{CL}$  and  $F_{k_{31}}$  are the slopes of the linear relationship between age and the pharmacokinetic parameters (see also Abbreviations for definition of symbols).

Thus, the model implies that CL and  $k_{31}$  remain constant up to 40 yr and then linearly decrease as a function of age. This relationship was found to describe best the difference between old and young and was empirically derived by comparing several models.

## BODY WEIGHT

Retaining the effect of age on both CL and  $k_{31}$ , the influence of body weight was then investigated. No relationship between body weight and the CL of alfentanil was found, but normalization of  $V_c$  for body weight yielded a definite improvement of the fit. The influence of body weight on  $V_c$  can be described as follows:

$$\widehat{V}_{c_j} = \overline{V}_{cw} \cdot BW_j \quad (9)$$

where  $\widehat{V}_{c_j}$  defines the estimate of the central compartment volume (in l) of patient  $j$ ,  $BW_j$  is the body weight in kg, and  $\overline{V}_{cw}$  is the population mean of the weight-normalized volume of the central compartment (in l/kg). Table 4 shows the results obtained without and with the inclusion of individual body weight in the regression model.

We also tested a model correcting the  $V_c$  by body weight raised to a power different from 1 (*i.e.*,  $\hat{V}_{c_j} = \bar{V}_{c_w} \cdot BW_j^F$ ), but no improvement of the prediction of  $V_c$  was achieved by including this additional parameter.

#### SEX

A small but consistent effect of sex on  $V_c$  was found. The volume of distribution (normalized for body weight) was 15% larger in females compared to males (table 5). Thus:

$$\hat{V}_{c_j} = \bar{V}_{c_w} \cdot BW_j \cdot F_{\text{sex}} \quad (10)$$

where  $F_{\text{sex}}$  represents the effect of sex on  $V_c$  for female patients and is constrained to 1.0 for males.

#### OTHER CONCOMITANT VARIABLES

The following factors were not retained in the regression model: duration of anesthesia, administration of etomidate for induction, and use of inhalational anesthetics. Inhalational anesthetics and the duration of anesthesia clearly lacked a significant influence on alfentanil pharmacokinetics ( $LLD < 5$ ), but the influence of etomidate was questionable. Expressing CL,  $V_c$ , and  $k_{12}$  as a function of etomidate administration resulted in relatively large differences in the  $-2 \log$  likelihood criterion. However, a large standard error of the estimates of magnitude of these effects and a high correlation with other influencing parameters, in particular with age, did not allow a definite conclusion concerning this drug interaction. This was probably due to an uneven distribution of this factor among the different study groups (table 1). For these reasons, the influence of etomidate was not retained in the regression model. We believe, however, that the question of the pharmacokinetic interaction between etomidate and alfentanil deserves further study.

#### VARIABILITY OF ALFENTANIL KINETICS

The unexplained interindividual differences in the plasma concentration profile of alfentanil could be described by a relatively simple random-effect model assigning interindividual variability to only two pharmacokinetic parameters: the CL and the volume of distribution of the central compartment. The interindividual (unexplained) variability was found for CL to be 48% (coefficient of variation) and for  $V_c$  33%. A significant correlation between CL and  $V_c$  was present across patients ( $r = 0.46$ ). The residual intraindividual variability was estimated as 25% (coefficient of variation). An example of the estimated probability density function (PDF) for CL is shown in figure 3.

#### GOODNESS OF FIT

To evaluate the goodness of fit of the final regression model, the second half of the data, not used during the stepwise regression analysis, was analyzed with all parameters constrained to their estimated values except the residual variance. The estimate of the residual variability using this new data set was close to the value determined from the original regression (20% *vs.* 24%, coefficient of variation), indicating adequate fit of the model to the concentration-time data in this patient population.

Tables 6 and 7 list the final estimates of all parameters, including the effect of age, body weight, and sex, and the interindividual and intraindividual variability based on the total of 614 plasma concentration measurements.

#### Discussion

Our data set consisted of most data previously published concerning alfentanil pharmacokinetics. Data from five groups of patients studied by Bovill *et al.*,<sup>12</sup> Camu *et al.*,<sup>13</sup> Helmers *et al.* (two groups),<sup>14</sup> and Schüttler and Stoeckel<sup>15</sup> were pooled. Two of these investigators used a two-compartment model to describe the pharmacokinetics of alfentanil and therefore are not directly comparable with our results. In particular, one would expect on the average an overestimation of both clearance and the volume of the central compartment if data obeying three-compartment pharmacokinetics are analyzed by a two-compartment model. This is probably the main reason why the CL of young patients ( $\leq 40$  yr) of the four just mentioned studies<sup>12-15</sup> is, on average, higher than the value found in our analysis (0.461 *vs.* 0.356 l/min). However, the two studies that used a three-compartment model<sup>12,13</sup> also report a clearance value approximately 30% higher than the value found in our study. The higher average CL found by Bovill *et al.*<sup>12</sup> can be explained by two patients with an extremely high CL (0.820 and 1.323 l/min, *i.e.*, almost two and three times the average value of their group). The influence of these two extreme values was much smaller when analyzing the whole set of 45 patients in our study. Both CL and  $V_c$  were found to be considerably higher by Camu *et al.*<sup>13</sup> This was also noted during our analysis. As we could find no reason that would explain this difference, the data were not excluded from our analysis so as not to underestimate the interindividual variability of the pharmacokinetics of alfentanil in patients treated in different institutions.

We found age had a significant influence, as did Helmers *et al.*,<sup>14</sup> who compared the alfentanil clearance in old and young adult patients. The magnitude of the influence of age also shows a good agreement ( $-30\%$  in the study of Helmers *et al.* *vs.*  $-28\%$  in the present study for a mean age of 77 yr). Our results thus confirm the findings

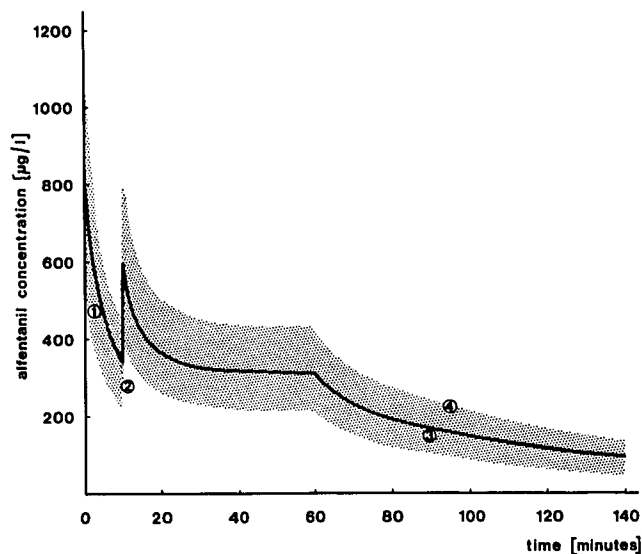

FIG. 4. Predicted plasma concentration of alfentanil (solid line) and 68% confidence interval (shaded area) calculated for a 70-yr-old female weighing 48 kg. Dosage: initial loading dose of 110  $\mu\text{g}/\text{kg}$ , maintenance infusion rate of 87  $\mu\text{g}/\text{min}$  up to the 60th min, bolus dose of 1.5 mg before skin incision.  $\text{Cp}_{50}$  for: ① intubation; ② skin incision; ③ skin closure; and ④ spontaneous respiration after terminating  $\text{N}_2\text{O}$ .

of these investigators in a larger context of all other studies. In contrast to Helmers *et al.*,<sup>14</sup> we also found an influence of age on the intercompartmental clearance, indicating that the drug has a slower redistribution from the deep compartment in older patients. Again, because different models were used (two- vs. three-compartment models), no direct comparison is possible.

Although there was a significant and consistent effect of sex on the volume of the central compartment, the magnitude was small, 15%, and the practical relevance is probably not very important.

No relationship between body weight and the CL was found for alfentanil. Similar findings have been reported for other drugs.<sup>27</sup> However, a normalization of  $V_c$  for body weight yielded a definite improvement of the fit and a reduction of the interindividual variability.

The influence of age and body weight on alfentanil pharmacokinetics has direct practical implications: to achieve a desired steady-state concentration, the loading dose of alfentanil should be adjusted according to body weight; and the maintenance infusion rate does not have to be weight adjusted because clearance was not found to be related to body weight in the range of weights studied (46–102 kg), but it has to be reduced with increasing age. In addition, changes in drug distribution and elimination will influence the terminal half-life ( $t_{1/2}$ ) of alfentanil. Older individuals with a greater body weight are expected to have longer  $t_{1/2}$ . For example, for a young female patient with a body weight of 65 kg, a  $t_{1/2}$  of 95

min can be calculated. In contrast, a 90-kg woman, 80 yr old, is expected to have a  $t_{1/2}$  more than twice as long (201 min). This large difference shows the practical importance of the influence of age and body weight on alfentanil pharmacokinetics as found in this study. For calculation of  $t_{1/2}$  from the basic parameters reported in tables 6 and 7, see appendix 1.

Probably the most important result of this study is the quantification of the residual unexplained interindividual variability of alfentanil pharmacokinetics. Indeed, just knowing the fixed effects (the pharmacokinetic parameters and their influencing factors) allows a prediction of the alfentanil concentration–time course to be made for each patient according to age, body weight, and sex. But this calculation yields only the “average” concentration curve from which individual patients may differ substantially. Only the additional knowledge of the random effects (the variance components) permit one to estimate how large these interindividual differences in the actually achieved concentration are expected to be, or in other words, how confident one can be about the predicted concentration. In practice this is accomplished by calculating the approximate 68% (*i.e.*, mean  $\pm$  1 SD) or 95% (*i.e.*, mean  $\pm$  2 SD) confidence interval of the predicted concentration, as illustrated by the following example.

Assume we wish to anesthetize, with alfentanil and  $\text{N}_2\text{O}/\text{O}_2$ , a 70-yr-old female weighing 48 kg for breast surgery. Her pharmacokinetic parameters for alfentanil and their interindividual variability can be derived from tables 6 and 7. Using the information about  $\text{Cp}_{50}$  for various stages of anesthesia,<sup>4,5</sup> we can now propose a dosing scheme, calculate the confidence interval for the plasma concentration *versus* time course, and compare it with the pharmacodynamic data. The calculation of the expected plasma concentration  $\pm$  SD (approximate 68% confidence interval) can be easily performed on an average size microcomputer using the algorithm described in appendix 1. If the desired target concentration at a given time does not lie within the calculated confidence limits, the dosing scheme is modified. By “trial and error” a dosing strategy can be found such that the lower confidence limit is above the “ $\text{Cp}_{50}$  for laryngoscopy” after the loading dose and above the “ $\text{Cp}_{50}$  for skin incision” at the time the surgeon starts the nociceptive stimulation (fig. 4). To assume rapid recovery, the upper confidence limit should lie below the “ $\text{Cp}_{50}$  for spontaneous respiration” at the end of the surgery. This is accomplished in our example by stopping the infusion 30 min before the completion of the surgical procedure (fig. 4).

This example illustrates the importance of taking interindividual pharmacokinetic variability into consideration when designing the optimal dosing scheme. The value of the population pharmacokinetic-analysis approach that was implemented in this study lies in its ability to provide



quantitative estimates of the magnitude of the interindividual variability, based on representative plasma concentration data. This allows the physician to assess the accuracy of a concentration prediction and the extent that it is limited by the interindividual variability. As can be seen from figure 4, even after correcting the pharmacokinetic parameters according to age, body weight, and sex, the interindividual variability of alfentanil plasma concentration remains relatively large. This large remaining unexplained pharmacokinetic variability indicates that additional plasma concentration measurements obtained intraoperatively as individual feedback information should be considered for optimal intravenous alfentanil anesthesia. Feedback control methods using drug level measurements have been successfully applied to other drugs.<sup>28-30</sup> However, the implementation for alfentanil would, in addition to population pharmacokinetics derived in this study, require a rapid and reliable drug assay and computer software for efficient use of the individual feedback.<sup>30</sup> The ideal method of individualizing alfentanil administration would be a continuous, noninvasive measure of the degree of narcotic effect on the brain. Thus, one would examine the drug effect instead of the pharmacokinetics, which are the driving force for the drug effect. Unfortunately, such a measure is not yet available, although the EEG power spectral analysis is being investigated.<sup>2</sup>

The authors wish to thank Drs. J. G. Bovill, F. Camu, H. Helmers, J. Schüttler, and their colleagues for allowing the use of their original data.

### References

1. Stanski DR, Hug CC Jr: Alfentanil: A kinetically predictable narcotic analgesic. *ANESTHESIOLOGY* 57:435-438, 1982
2. Scott JC, Ponganis KV, Stanski DR: EEG quantitation of narcotic effect: The comparative pharmacodynamics of fentanyl and alfentanil. *ANESTHESIOLOGY* 62:234-241, 1985
3. Ausems ME, Hug CC Jr, deLange S: Variable rate infusion of alfentanil as a supplement to nitrous oxide anesthesia for general surgery. *Anesth Analg* 62:982-986, 1983
4. Ausems ME, Hug CC Jr: Plasma concentrations of alfentanil required to supplement nitrous oxide anaesthesia for lower abdominal surgery. *Br J Anaesth* 55:191S-197S, 1983
5. Ausems ME, Hug CC Jr, Stanski DR, Burm AGL: Plasma concentrations of alfentanil required to supplement nitrous oxide anesthesia for general surgery. *ANESTHESIOLOGY* 65:362-373, 1986
6. Wagner JG: A safe method for rapidly achieving plasma concentration plateaus. *Clin Pharmacol Ther* 16:691-700, 1974
7. Rigg JRA, Ulong TY: A method for achieving rapidly steady state blood concentrations of IV drugs. *Br J Anaesth* 53:1247-1257, 1981
8. Sebel PS, Bovill JG, Lalor JM, Morgan RJM, Morton J: Pharmacokinetics of two different infusion regimes for alfentanil (abstract). *ANESTHESIOLOGY* 63:A371, 1985
9. Schüttler J, Schwilden H, Stoeckel H: Pharmacokinetics as applied to total intravenous anaesthesia. *Anaesthesia* 38:53, 1983
10. Ausems ME, Stanski DR, Hug CC: An evaluation of the accuracy of pharmacokinetic data for the computer assisted infusion of alfentanil. *Br J Anaesth* 57:1217-1225, 1985
11. Steimer JL, Mallet A, Mentre F: Estimating interindividual pharmacokinetic variability, Variability in Drug Therapy: Description, Estimation and Control. Edited by Rowland M, Sheiner LB, Steimer JL. New York, Raven Press, 1985, pp 65-111
12. Bovill JG, Sebel PS, Blackburn CL, Heykants J: The pharmacokinetics of alfentanil (R39209): A new opioid analgesic. *ANESTHESIOLOGY* 57:439-443, 1982
13. Camu F, Cepts E, Rucquoi M, Heykants J: Pharmacokinetics of alfentanil in man. *Anesth Analg* 61:657-661, 1982
14. Helmers H, Van Peer A, Woestenborghs R, Norduin H, Heykants J: Alfentanil kinetics in the elderly. *Clin Pharmacol Ther* 36:239-243, 1984
15. Schüttler J, Stoeckel H: Alfentanil (R 39209) ein neues kurzwirkendes Opioid. *Anaesthesist* 31:10-14, 1982
16. Michiels M, Hendriks R, Heykants J: Radioimmunoassay of the new opiate analgesics alfentanil and sufentanil: Preliminary pharmacokinetic profile in man. *J Pharm Pharmacol* 35:86-93, 1983
17. Westenborghs R, Michielsen L, Heykants J: Rapid and sensitive gas chromatography method for the determination of alfentanil and sufentanil in biological samples. *J Chromatogr* 224:112-127, 1981
18. Schüttler J, White PF: Optimization of the radioimmunoassays for measuring fentanyl and alfentanil in human serum. *ANESTHESIOLOGY* 61:315-320, 1984
19. Sheiner LB, Rosenberg B, Marathe VV: Estimation of population characteristics of pharmacokinetic parameters from routine clinical data. *J Pharmacokin Biopharm* 5:445-479, 1977
20. Metzler CM: NONLIN, A Computer Program for Parameter Estimation in Non-Linear Situations. Kalamazoo: The Upjohn Company, Biostatistics Department, 1968
21. Gibaldi M, Perrier D: Pharmacokinetics. New York, M Dekker, 1982
22. Sheiner LB, Grasela TH: Experience with NONMEM: Analysis of routine phenytoin clinical pharmacokinetic data. *Drug Metab Rev* 15:293-303, 1984
23. Vozeh S, Katz G, Steiner V, Follath F: Population pharmacokinetic parameters in patients treated with oral mexiletine. *Eur J Clin Pharmacol* 23:445-451, 1982
24. Vozeh S, Wenk M, Follath F: Experience with NONMEM: Analysis of serum concentration data in patients treated with mexiletine and lidocaine. *Drug Metab Rev* 15:305-315, 1984
25. Powell JR, Vozeh S, Hopewell P, Costello J, Sheiner LB, Riegelman S: Theophylline disposition in acutely ill hospitalized patients. *Am Rev. Respir Dis* 118:229-238, 1978
26. Draper NR, Smith H: Applied Regression Analysis. New York, John Wiley & Son, 1966
27. Grasela TH, Sheiner LB: Population pharmacokinetics of procainamide from routine clinical data. *Clin Pharmacokin* 9:545-554, 1984
28. Burton ME, Brater DC, Chen PS, Day RB, Huber PJ, Vasko MR: A Bayesian feedback method of aminoglycoside dosing. *Clin Pharmacol Ther* 37:349-357, 1985
29. Vozeh S, Berger M, Wenk M, Ritz R, Follath F: Rapid prediction of individual dosage requirements for lignocaine. *Clin Pharmacokin* 9:354-363, 1984
30. Vozeh S, Steimer JL: Feedback control methods for drug dosage optimisation. *Clin Pharmacokin* 10:457-476, 1985
31. Rowland M, Tucker G: Symbols in pharmacokinetics. *J Pharmacokin Biopharm* 8:497-507, 1980

Appendix 1

```

100 REM ** PREDICTION OF PLASMA CONCENTRATION OF ALFENTANIL AND
110 REM ** ITS 68% LOWER AND UPPER CONFIDENCE BOUNDS
120 REM ** P. MAITRE, MD DEPARTMENT OF ANESTHESIOLOGY
130 REM ** UNIVERSITY HOSPITAL BASEL SWITZERLAND
140 REM ** ANSI BASIC (MICROSOFT BASIC-80 REL 5.0)
150 DEFDBL A-H,K-L,O-Z:REM DEFINE CALCULATION IN DOUBLE PRECISION (H)
160 DEFINT I-J,M-N :REM EXCEPT FOR COUNTERS
170 REM
180 GOSUB 1000 : REM INDIVIDUALIZATION OF PHARMACOKINETIC PARAMETERS
190 GOSUB 2000 : REM DRUG INPUT (IV BOLUS AND INFUSION RATES)
200 GOSUB 3000 : REM TRANSFORMATION OF MICROCONSTANTS Kij INTO HYBRID RATE
210 REM CONSTANTS LAMBDA 1 LAMBDA 2 AND LAMBDA 3
220 GOSUB 4000 : REM PREDICTION ALGORITHM
230 END
1000 REM *****
1010 REM ** CALCULATION OF PHARMACOKINETIC PARAMETERS ACCORDING TO
1020 REM ** AGE, GENDER AND BODY WEIGHT (SEE TABLE 6 AND 7)
1030 INPUT "AGE " :AGE :LPRINT "AGE " :AGE
1040 INPUT "SEX (M or F) " :SEX :LPRINT "SEX " :SEX
1050 INPUT "BODY WEIGHT IN KG " :BW :LPRINT "BW " :BW
1060 K12 = .102 :REM
1070 K21 = .0673 :REM
1080 K13 = .017 :REM
1090 K31 = .0126 :REM
1100 CLEARANCE = .356 :REM
1110 IF AGE < 40 THEN GOTO 1140 :REM
1120 K31 = .0126 - .000113 * (AGE - 40) :REM
1130 CLEARANCE = .356 - .00267 * (AGE - 40) :REM
1140 VOLUME = .111 * BW :REM VOLUME OF THE CENTRAL COMPARTMENT
1150 IF SEX = "F" THEN VOLUME = .111 * BW * 1.15
1160 OMEGAS(1,1) = .155 :REM >> THE ARRAY OMEGAS IS THE COVARIANCE
1170 OMEGAS(1,2) = .0515 :REM MATRIX OF THE ERROR TERMS ETA (ENTER -
1180 OMEGAS(2,1) = .0515 :REM - INDIVIDUAL VARIABILITY) (EQ 2-5) <<
1190 OMEGAS(2,2) = .0819 :REM >> SIGMAS IS THE VARIANCE OF THE ERROR TERM
1200 SIGMAS = .0519 :REM EPSILON (INTRAINDIV. VARIABILITY) (EQ 6) <<
1210 RETURN
2000 REM *****
2010 REM ** DRUG INPUT CHARACTERISTICS
2020 INPUT "TIME LIMIT OF PREDICTION (in Min) " :TEND
2030 PRINT:PRINT "Time interval between two inputs"
2040 PRINT "must be more than " :TEND/100 :MIN :PRINT
2050 PRINT " TIME, " :IV BOLUS, " :INFUSION RATE"
2060 LPRINT " TIME, " :IV BOLUS, " :INFUSION RATE"
2070 PRINT " (min), " :"(mg)", " :"(ug/min) (MAX 10X)"
2080 LPRINT " (min), " :"(mg)", " :"(ug/min) (MAX 10X)"
2090 FOR I = 0 TO 9
2100 PRINT I :INPUT I :LPRINT I (I),
2110 PRINT " " :INPUT I
2120 BOL(I) = B * 1000 :LPRINT B,
2130 PRINT " " :INPUT I :DINFR(I) :PRINT :LPRINT DINFR(I)
2140 IF T(I) = 0 AND BOL(I) = 0 AND DINFR(I) = 0 THEN NI = I - 1 : GOTO 2170
2150 NEXT I
2160 NI = 10 :REM (IV BOLUS, INFUSION OR BOTH)
2170 RETURN
3000 REM *****
3010 REM ** TRANSFORMATION OF MICROCONSTANTS Kij INTO HYBRID RATE
3020 REM ** CONSTANT LAMBDA 1 LAMBDA 2 AND LAMBDA 3, WHICH ARE THE
3030 REM ** ROOTS OF A CUBIC EQUATION X^3 + B2X^2 + B1X + B0 = 0
3040 REM ** (SEE VALUE OF B2,B1,B0 BELOW).
3050 FOR I = 1 TO 3
3060 IF I = 1 THEN CL = CLEARANCE : VC = VOLUME : REM >> CALCULATES
3070 IF I = 2 THEN CL = CLEARANCE * 1.001 : VC = VOLUME : REM >> CALCULATES
3080 IF I = 3 THEN CL = CLEARANCE : VC = VOLUME * 1.001 : REM LAMBDA3 WITH
3090 REM NUMERICAL PARTIAL DERIVATIVES BELOW <<
3110 K10 = CL/VC :REM ELIMINATION RATE CONSTANT
3120 B0 = K10 * K31 * K21
3130 B1 = K10*K31 + K21*K31 + K21*K13 + K10*K21 + K31*K12
3140 B2 = K10 + K12 + K21 + K13 + K31
3150 PHI2 = 3.14159 * 2/3
3160 PHI3 = 3.14159 * 4/3
3170 P = B1 - (B2*B2/3)
3180 Q = (2*B2*B2*B2/27) - (B1*B2/3)*B0
3190 R = SQR(-(P+P*P)/27)
3200 COSPHI = (-Q/2)/R
3210 ACOS = -AIN(COSPHI/SQR(-COSPHI+COSPHI*18))+1.5708 :REM >> APPROXIMATION
3220 PHI = ACOS :REM OF ARCCOS(COSPHI) SINCE THE FUNCTION ARCCOS(X)
3230 RI = 2*EXP(LOG(R)/3) :REM DOES NOT EXIST IN BASIC <<
3240 COS1 = COS(PHI/3)
3250 COS2 = COS(PHI/3 + PHI/2)
3260 COS3 = COS(PHI/3 + PHI/3)
3270 X(1) = -RI*COS1 + B2/3
3280 X(2) = -RI*COS2 + B2/3
3290 X(3) = -RI*COS3 + B2/3
3300 FOR II = 1 TO 3 :REM THIS LOOP SORTS THE ROOTS IN A DECREASING ORDER
3310 FOR JJ = II + 1 TO 3
3320 IF X(II) > X(JJ) THEN GOTO 3340
3330 TEMP = X(II) : X(II) = X(JJ) : X(JJ) = TEMP
3340 NEXT JJ
3350 NEXT II
3360 FOR N = 1 TO 3
3370 L(N,1) = X(N)
3380 NEXT N
3390 NEXT I
3400 LPRINT "TERMINAL ELIM. HALF LIFE (MIN) = " :USING "###.#" :.693/W/L(3,1)
3410 RETURN
4000 REM *****
4010 REM ** PREDICTIVE ALGORITHM (SUPERPOSITION PRINCIPLE)
4020 LPRINT:LPRINT:LPRINT
4030 LPRINT "TIME CONC. 68% CONFIDENCE INTERVAL":LPRINT
4040 J = 0 :REM COUNTS HOW MANY INPUTS HAVE ALREADY BEEN ADMINISTERED AT TIME T
4050 FOR I = 0 TO 100
4060 T = I * TEND/100
4070 IF J = NI THEN GOTO 4110
4080 IF T >= T(J+1) THEN T = T(J+1) : J = J+1
4090 IF J > NI THEN J = NI
4100 IF T > T(NI) THEN GOTO 4110
4110 FOR M = 1 TO 3
4120 A = 0

```

```

4130 IF M = 1 THEN CL = CLEARANCE : VC = VOLUME : REM >> LOOP FOR
4140 REM CALCULATION OF THE PREDICTED CONCENTRATION <<
4150 IF M = 2 THEN CL = CLEARANCE * 1.001 : VC = VOLUME : REM >> CALCULATES
4160 IF M = 3 THEN CL = CLEARANCE : VC = VOLUME * 1.001 : REM CONCENTRATION
4170 REM WITH PARAMETER VALUE SHIFTED) NEEDED
4180 REM FOR NUMERICAL PARTIAL DERIVATIVES BELOW <<
4190 FOR N = 0 TO J :REM >> THIS LOOP USES SUPERPOSITION PRINCIPLE TO
4200 REM CALCULATE THE AMOUNT A IN
4210 IF N = NI THEN DINFT = T-T(NI) : GOTO 4230 :REM CENTRAL COMPARTMENT
4220 IF T >= T(N+1) THEN DINFT = T-(N+1)-T(N) : REM AT TIME T <<
4230 DIN(1) = BOL(N) + (DINFR(N)/(-L(1,M))) * (1 - EXP(L(1,M) * (DINFT)))
4240 DIN(2) = BOL(N) + (DINFR(N)/(-L(2,M))) * (1 - EXP(L(2,M) * (DINFT)))
4250 DIN(3) = BOL(N) + (DINFR(N)/(-L(3,M))) * (1 - EXP(L(3,M) * (DINFT)))
4260 C(1) = (K21-L(1,M)) * (K31-L(1,M)) / (L(2,M)-L(1,M)) * L(3,M)-L(1,M))
4270 C(2) = (K21-L(2,M)) * (K31-L(2,M)) / (L(1,M)-L(2,M)) * L(3,M)-L(2,M))
4280 C(3) = (K21-L(3,M)) * (K31-L(3,M)) / (L(1,M)-L(3,M)) * L(2,M)-L(3,M))
4290 F = 0
4300 FOR M1 = 1 TO 3
4310 F = F + DIN(M1) * C(M1) * EXP(-L(M1,M) * (T-T(N)))
4320 NEXT M1
4330 A = A + F
4340 NEXT N
4350 CP(M) = A/VC
4360 NEXT M
4370 CONC = CP(1) : REM PREDICTED PLASMA CONCENTRATION
4380 DCCL = (CP(2)-CONC)/(CLEARANCE*.001) : REM >> PARTIAL DERIVATIVES OF
4390 DCVC = (CP(3)-CONC)/(VOLUME*.001) : REM THE PREDICTED CONCENTRATION WITH
4400 REM RESPECT TO CLEARANCE (DCCL) AND VOLUME OF THE CENTRAL CPT (DCVC) <<
4410 G(1) = DCCL * CLEARANCE : REM >> PARTIAL DERIVATIVES OF THE PREDICTED
4420 G(2) = DCVC * VOLUME : REM CONCENTRATION WITH RESPECT TO ETA(1,1)
4430 REM AND ETA(1,2) (SEE EQ 3 AND 5) <<
4440 REM
4450 REM CALCULATION OF 68% CONFIDENCE INTERVAL OF THE PREDICTED CONC.
4460 VARCP = G(1)*OMEGAS(1,1)*G(1) + G(1)*OMEGAS(1,2)*G(2)
4470 VARCP = VARCP + G(2)*OMEGAS(2,1)*G(1) + G(2)*OMEGAS(2,2)*G(2)
4480 VARCP = VARCP + (CONC**2)*SIGMAS : REM >> USES FIRST TERM TAYLOR
4490 REM SERIES APPROXIMATION TO CALCULATE VARIANCE
4500 REM OF PREDICTED CONCENTRATION (SEE EQS 3-6 FOR
4510 REM ASSUMPTIONS ABOUT THE STATISTICAL MODEL) <<
4520 SD = SQR(VARCP) : REM GET STANDARD DEVIATION
4530 UPB68 = CONC + SD
4540 LOWB68 = CONC - SD
4550 LPRINT USING "#####.# " : I : CONC : UPB68 : LOWB68
4560 NEXT I
4570 RETURN
4580 REM *****

```

OUTPUT SAMPLE (SEE FIG. 4)

|       |          |               |  |           |
|-------|----------|---------------|--|-----------|
| AGE   | 70       |               |  |           |
| SEX   | F        |               |  |           |
| BW    | 48       |               |  |           |
| TIME  | IV BOLUS | INFUSION RATE |  |           |
| (min) | (mg)     | (ug/min)      |  | (MAX 10X) |
| 0     | 5.75     | 87            |  |           |
| 10    | 1.5      | 87            |  |           |
| 60    | 0        | 0             |  |           |
| 0     | 0        | 0             |  |           |

TERMINAL ELIM. HALF LIFE (MIN) = 118.6

|      |       |                         |
|------|-------|-------------------------|
| TIME | CONC. | 68% CONFIDENCE INTERVAL |
| 0.0  | 938.4 | 1281.5 595.4            |
| 1.0  | 812.5 | 1106.8 518.2            |
| 2.0  | 710.5 | 966.0 454.9             |
| 3.0  | 627.8 | 852.5 403.2             |
| 4.0  | 560.9 | 761.0 360.8             |
